# Supplementary material for: β-Cells Are Not Generated in Pancreatic Duct Ligation–Induced Injury in Adult Mice
Source: PubMed Central journal article supplement — Diabetes. 2013 Apr 16;62(5):1634–45. doi: 10.2337/db12-0848 (PMC3636617; doi:10.2337/db12-0848), 2013-04-16

SUPPLEMENTARY DATA

**Supplementary Table 1.** Individual data from sham-operated or PDL 7 day mixed genetic background cohort at 7 days. (top) Age, body weight, and glycemia of sham-operated and PDL cohort. (middle) Morphometry of pancreas head. (bottom) Morphometry and proliferation analysis of pancreas tail.

|               |          | <b>B6129 7-day cohort</b>     |                                   |                              |                             |                                     |                                      |
|---------------|----------|-------------------------------|-----------------------------------|------------------------------|-----------------------------|-------------------------------------|--------------------------------------|
|               |          | <b>Age</b>                    | <b>Physiological observations</b> |                              |                             |                                     |                                      |
| <b>Group</b>  | <b>#</b> | <b>Age at harvest (weeks)</b> | <b>Pre-OP body mass (g)</b>       | <b>Harvest body mass (g)</b> | <b>Body mass change (g)</b> | <b>Pre-OP blood glucose (mg/dl)</b> | <b>Harvest blood glucose (mg/dl)</b> |
| B6129 Sham D7 | 1        | 7                             | 20.0                              | 21.4                         | 1.4                         | 154.0                               | 129.0                                |
| B6129 Sham D7 | 2        | 7                             | 19.5                              | 21.8                         | 2.3                         | 150.0                               | 130.0                                |
| B6129 Sham D7 | 3        | 7                             | 14.7                              | 20.8                         | 6.1                         | 148.0                               | 153.0                                |
| B6129 Sham D7 | 4        | 7                             | 16.4                              | 21.6                         | 5.2                         | 171.0                               | 112.0                                |
| B6129 Sham D7 | 5        | 7                             | 17.4                              | 21.8                         | 4.4                         | 158.0                               | 146.0                                |
| average       |          | 7                             | 17.6                              | 21.5                         | 3.9                         | 156.2                               | 134.0                                |
| std error     |          | 0.0                           | 1.0                               | 0.2                          | 0.9                         | 4.1                                 | 7.2                                  |
| B6129 PDL D7  | 1        | 8                             | 21.6                              | 22.1                         | 0.5                         | 154.0                               | 141.0                                |
| B6129 PDL D7  | 2        | 7                             | 17.4                              | 20.7                         | 3.3                         | 155.0                               | 160.0                                |
| B6129 PDL D7  | 3        | 7                             | 18.5                              | 19.0                         | 0.5                         | 171.0                               | 133.0                                |
| B6129 PDL D7  | 4        | 7                             | 18.2                              | 19.4                         | 1.2                         | 147.0                               | 154.0                                |
| B6129 PDL D7  | 5        | 7                             | 21.0                              | 21.8                         | 0.8                         | 156.0                               | 142.0                                |
| average       |          | 7                             | 19.3                              | 20.6                         | 1.3                         | 156.6                               | 146.0                                |
| std error     |          | 0.2                           | 0.8                               | 0.6                          | 0.5                         | 3.9                                 | 4.8                                  |

|               |          | <b>Duodenal and gastric pancreas (head)</b> |                          |                                       |                                     |                         |
|---------------|----------|---------------------------------------------|--------------------------|---------------------------------------|-------------------------------------|-------------------------|
|               |          | <b>Analysis of beta cell mass</b>           |                          |                                       |                                     |                         |
| <b>Group</b>  | <b>#</b> | <b>Pancreas mass (mg)</b>                   | <b>Sections analyzed</b> | <b>Pancreas area (mm<sup>2</sup>)</b> | <b>β-cell area (mm<sup>2</sup>)</b> | <b>β-cell mass (mg)</b> |
| B6129 Sham D7 | 1        | 83                                          | 27                       | 552                                   | 3.3                                 | 0.50                    |
| B6129 Sham D7 | 2        | 95                                          | 26                       | 647                                   | 2.9                                 | 0.43                    |
| B6129 Sham D7 | 3        | 80                                          | 24                       | 355                                   | 1.6                                 | 0.37                    |
| B6129 Sham D7 | 4        | 75                                          | 22                       | 307                                   | 1.4                                 | 0.34                    |
| B6129 Sham D7 | 5        | 101                                         | 17                       | 385                                   | 1.7                                 | 0.44                    |
| average       |          | 87                                          | 23                       | 449                                   | 2.2                                 | 0.41                    |
| std error     |          | 4.8                                         | 2                        | 64                                    | 0.4                                 | 0.03                    |
| B6129 PDL D7  | 1        | 102                                         | 30                       | 333                                   | 1.7                                 | 0.52                    |
| B6129 PDL D7  | 2        | 72                                          | 25                       | 384                                   | 1.8                                 | 0.35                    |
| B6129 PDL D7  | 3        | 97                                          | 29                       | 808                                   | 3.7                                 | 0.44                    |
| B6129 PDL D7  | 4        | 68                                          | 27                       | 354                                   | 1.6                                 | 0.31                    |
| B6129 PDL D7  | 5        | 81                                          | 25                       | 366                                   | 1.4                                 | 0.31                    |
| average       |          | 84                                          | 27                       | 449                                   | 2.0                                 | 0.38                    |
| std error     |          | 6.7                                         | 1                        | 90                                    | 0.4                                 | 0.04                    |

SUPPLEMENTARY DATA

|               |   | Splenic pancreas (tail)    |                   |                                  |                                       |                         |                               |                          |                               |                              |  |
|---------------|---|----------------------------|-------------------|----------------------------------|---------------------------------------|-------------------------|-------------------------------|--------------------------|-------------------------------|------------------------------|--|
|               |   | Analysis of beta cell mass |                   |                                  |                                       |                         | Analysis of islet replication |                          |                               |                              |  |
| Group         | # | Pancreas mass (mg)         | Sections analyzed | Pancreas area (mm <sup>2</sup> ) | $\beta$ -cell area (mm <sup>2</sup> ) | $\beta$ -cell mass (mg) | $\beta$ -cells counted        | ki67+ $\beta$ -cells (%) | Islet cocktail+ cells counted | % ki67+ islet cocktail cells |  |
| B6129 Sham D7 | 1 | 109                        | 27                | 603                              | 3.4                                   | 0.50                    |                               |                          |                               |                              |  |
| B6129 Sham D7 | 2 | 108                        | 22                | 473                              | 2.6                                   | 0.43                    | 1158                          | 5.0                      | 809                           | 5.3                          |  |
| B6129 Sham D7 | 3 | 89                         | 24                | 431                              | 4.2                                   | 0.37                    | 516                           | 5.0                      | 358                           | 5.0                          |  |
| B6129 Sham D7 | 4 | 94                         | 21                | 414                              | 2.9                                   | 0.34                    |                               |                          |                               |                              |  |
| B6129 Sham D7 | 5 | 100                        | 20                | 482                              | 2.7                                   | 0.44                    | 682                           | 3.7                      | 461                           | 2.2                          |  |
| average       |   | 100                        | 23                | 481                              | 3.2                                   | 0.41                    | 785                           | 4.6                      | 543                           | 4.2                          |  |
| std error     |   | 3.9                        | 1                 | 33                               | 0.3                                   | 0.03                    | 192                           | 0.5                      | 136                           | 1.0                          |  |
| B6129 PDL D7  | 1 | 31                         | 22                | 112                              | 3.4                                   | 0.52                    | 912                           | 2.3                      | 354                           | 2.3                          |  |
| B6129 PDL D7  | 2 | 35                         | 20                | 199                              | 3.9                                   | 0.35                    |                               |                          |                               |                              |  |
| B6129 PDL D7  | 3 | 25                         | 21                | 147                              | 2.8                                   | 0.44                    | 566                           | 2.3                      | 466                           | 2.4                          |  |
| B6129 PDL D7  | 4 | 49                         | 19                | 149                              | 2.5                                   | 0.31                    | 718                           | 5.4                      | 442                           | 5.2                          |  |
| B6129 PDL D7  | 5 | 33                         | 21                | 183                              | 3.4                                   | 0.31                    |                               |                          |                               |                              |  |
| average       |   | 35                         | 21                | 158                              | 3.2                                   | 0.38                    | 732                           | 3.3                      | 421                           | 3.3                          |  |
| std error     |   | 4                          | 1                 | 15                               | 0.2                                   | 0.04                    | 100                           | 1.0                      | 34                            | 1.0                          |  |

**Supplementary Table 2.** Individual data from sham-operated or PDL 14 day mixed genetic background cohort at 7 days. (top) Age, body weight, and glycemia of sham-operated and PDL cohort. (middle) Morphometry of pancreas head. (bottom) Morphometry and proliferation analysis of pancreas tail.

|                |   | B6129 14-day cohort    |                            |                       |                      |                              |                               |
|----------------|---|------------------------|----------------------------|-----------------------|----------------------|------------------------------|-------------------------------|
|                |   | Age                    | Physiological observations |                       |                      |                              |                               |
| Group          | # | Age at harvest (weeks) | Pre-OP body mass (g)       | Harvest body mass (g) | Body mass change (g) | Pre-OP blood glucose (mg/dl) | Harvest blood glucose (mg/dl) |
| B6129 Sham D14 | 1 | 8                      | 17.2                       | 23.4                  | 6.2                  | 145.0                        | 186.0                         |
| B6129 Sham D14 | 2 | 9                      | 18.6                       | 28.0                  | 9.4                  | 119.0                        | 179.0                         |
| B6129 Sham D14 | 3 | 8                      | 18.8                       | 23.5                  | 4.7                  | 119.0                        | 134.0                         |
| B6129 Sham D14 | 4 | 8                      | 19.5                       | 24.7                  | 5.2                  | 126.0                        | 141.0                         |
| B6129 Sham D14 | 5 | 8                      | 18.6                       | 24.0                  | 5.4                  | 127.0                        | 176.0                         |
| average        |   | 8                      | 18.5                       | 24.7                  | 6.2                  | 127.2                        | 163.2                         |
| std error      |   | 0.2                    | 0.4                        | 0.9                   | 0.8                  | 4.8                          | 10.7                          |
| B6129 PDL D14  | 1 | 8                      | 19.5                       | 23.0                  | 3.5                  | 150.0                        | 135.0                         |
| B6129 PDL D14  | 2 | 9                      | 21.8                       | 25.0                  | 3.2                  | 160.0                        | 151.0                         |
| B6129 PDL D14  | 3 | 8                      | 19.7                       | 22.9                  | 3.2                  | 162.0                        | 141.0                         |
| B6129 PDL D14  | 4 | 9                      | 21.9                       | 22.6                  | 0.7                  | 172.0                        | 144.0                         |
| B6129 PDL D14  | 5 | 8                      | 20.5                       | 22.3                  | 1.8                  | 136.0                        | 148.0                         |
| average        |   | 8                      | 20.7                       | 23.2                  | 2.5                  | 156.0                        | 143.8                         |
| std error      |   | 0.2                    | 0.5                        | 0.5                   | 0.5                  | 6.1                          | 2.8                           |

SUPPLEMENTARY DATA

| <b>Duodenal and gastric pancreas (head)</b> |   |                    |                   |                                  |                                |                  |
|---------------------------------------------|---|--------------------|-------------------|----------------------------------|--------------------------------|------------------|
| <b>Analysis of beta cell mass</b>           |   |                    |                   |                                  |                                |                  |
| Group                                       | # | Pancreas mass (mg) | Sections analyzed | Pancreas area (mm <sup>2</sup> ) | β-cell area (mm <sup>2</sup> ) | β-cell mass (mg) |
| B6129 Sham D14                              | 1 | 118                | 28                | 533                              | 1.7                            | 0.39             |
| B6129 Sham D14                              | 2 | 113                | 25                | 545                              | 2.5                            | 0.52             |
| B6129 Sham D14                              | 3 | 112                | 0                 | 0                                | 0.0                            |                  |
| B6129 Sham D14                              | 4 | 117                | 21                | 415                              | 2.1                            | 0.63             |
| B6129 Sham D14                              | 5 | 134                | 30                | 518                              | 1.8                            | 0.48             |
| average                                     |   | 119                | 21                | 503                              | 2.0                            | 0.50             |
| std error                                   |   | 4.0                | 5                 | 30                               | 0.2                            | 0.05             |
| B6129 PDL D14                               | 1 | 106                | 0                 | 0                                | 0.0                            |                  |
| B6129 PDL D14                               | 2 | 131                | 28                | 865                              | 2.9                            | 0.45             |
| B6129 PDL D14                               | 3 | 117                | 29                | 503                              | 1.3                            | 0.31             |
| B6129 PDL D14                               | 4 | 115                | 26                | 655                              | 2.6                            | 0.45             |
| B6129 PDL D14                               | 5 | 109                | 35                | 500                              | 1.7                            | 0.35             |
| average                                     |   | 116                | 24                | 631                              | 2.1                            | 0.39             |
| std error                                   |   | 4.3                | 6                 | 86                               | 0.4                            | 0.03             |

| <b>Splenic pancreas (tail)</b>    |   |                    |                   |                                        |                                |                  |                                      |                   |                               |                              |
|-----------------------------------|---|--------------------|-------------------|----------------------------------------|--------------------------------|------------------|--------------------------------------|-------------------|-------------------------------|------------------------------|
| <b>Analysis of beta cell mass</b> |   |                    |                   |                                        |                                |                  | <b>Analysis of islet replication</b> |                   |                               |                              |
| Group                             | # | Pancreas mass (mg) | Sections analyzed | Total pancreas area (mm <sup>2</sup> ) | β-cell area (mm <sup>2</sup> ) | β-cell mass (mg) | β-cells counted                      | ki67+ β-cells (%) | Islet cocktail+ cells counted | % ki67+ islet cocktail cells |
| B6129 Sham D14                    | 1 | 126                | 36                | 598                                    | 4.3                            | 0.90             | 778                                  | 2.18              | 460.295                       | 1.30                         |
| B6129 Sham D14                    | 2 | 162                | 28                | 480                                    | 5.2                            | 0.64             | 913                                  | 3.3               | 616                           | 1.9                          |
| B6129 Sham D14                    | 3 | 129                | 30                | 595                                    | 3.4                            | 0.73             |                                      |                   |                               |                              |
| B6129 Sham D14                    | 4 | 128                | 0                 |                                        |                                |                  |                                      |                   |                               |                              |
| B6129 Sham D14                    | 5 | 132                | 34                | 465                                    | 1.9                            | 0.55             | 625                                  | 2.4               | 289                           | 2.4                          |
| average                           |   | 135                | 26                | 534                                    | 3.7                            | 0.70             | 772                                  | 2.6               | 455                           | 1.9                          |
| std error                         |   | 6.7                | 7                 | 36                                     | 0.7                            | 0.07             | 83                                   | 0.3               | 95                            | 0.3                          |
| B6129 PDL D14                     | 1 | 30                 | 21                | 114                                    | 2.7                            | 0.72             | 1268                                 | 2.4               | 592                           | 3.5                          |
| B6129 PDL D14                     | 2 | 29                 | 18                | 171                                    | 4.0                            | 0.68             | 1063                                 | 2.2               | 549                           | 2.4                          |
| B6129 PDL D14                     | 3 | 33                 | 15                | 186                                    | 3.7                            | 0.66             |                                      |                   |                               |                              |
| B6129 PDL D14                     | 4 | 28                 | 15                | 124                                    | 3.4                            | 0.76             | 684                                  | 1.6               | 531                           | 1.3                          |
| average                           |   | 30                 | 17                | 149                                    | 3.5                            | 0.70             | 1005                                 | 2.0               | 558                           | 2.4                          |
| std error                         |   | 1                  | 1                 | 18                                     | 0.3                            | 0.02             | 171                                  | 0.2               | 18                            | 0.6                          |

SUPPLEMENTARY DATA

**Supplementary Table 3.** Individual data from sham-operated or PDL 30 day mixed genetic background cohort at 7 days. (top) Age, body weight, and glycemia of sham-operated and PDL cohort. (middle) Morphometry of pancreas head. (bottom) Morphometry and proliferation analysis of pancreas tail.

|                |          | <b>B6129 30-day cohort</b>    |                                   |                              |                             |                                     |                                      |
|----------------|----------|-------------------------------|-----------------------------------|------------------------------|-----------------------------|-------------------------------------|--------------------------------------|
|                |          | <b>Age</b>                    | <b>Physiological observations</b> |                              |                             |                                     |                                      |
| <b>Group</b>   | <b>#</b> | <b>Age at harvest (weeks)</b> | <b>Pre-OP body mass (g)</b>       | <b>Harvest body mass (g)</b> | <b>Body mass change (g)</b> | <b>Pre-OP blood glucose (mg/dl)</b> | <b>Harvest blood glucose (mg/dl)</b> |
| B6129 Sham D30 | 1        | 11                            | 20.3                              | 25.5                         | 5.2                         | 139.0                               | 143.0                                |
| B6129 Sham D30 | 2        | 11                            | 20.8                              | 26.6                         | 5.8                         | 132.0                               | 114.0                                |
| B6129 Sham D30 | 3        | 11                            | 22.3                              | 30.2                         | 7.9                         | 139.0                               | 121.0                                |
| B6129 Sham D30 | 4        | 11                            | 23.1                              | 30.1                         | 7.0                         | 143.0                               | 120.0                                |
| B6129 Sham D30 | 5        | 11                            | 23.8                              | 29.3                         | 5.5                         | 150.0                               | 129.0                                |
| average        |          | 11                            | 22.1                              | 28.3                         | 6.3                         | 140.6                               | 125.4                                |
| std error      |          | 0.0                           | 0.7                               | 1.0                          | 0.5                         | 2.9                                 | 5.0                                  |
| B6129 PDL D30  | 1        | 11                            | 22.0                              | 27.8                         | 5.8                         | 159.0                               | 128.0                                |
| B6129 PDL D30  | 2        | 11                            | 21.9                              | 22.3                         | 0.4                         | 172.0                               | 137.0                                |
| B6129 PDL D30  | 3        | 11                            | 21.2                              | 27.7                         | 6.5                         | 140.0                               | 117.0                                |
| B6129 PDL D30  | 4        | 11                            | 20.4                              | 25.9                         | 5.5                         | 146.0                               | 123.0                                |
| B6129 PDL D30  | 5        | 11                            | 23.8                              | 29.5                         | 5.7                         | 127.0                               | 133.0                                |
| average        |          | 11                            | 21.9                              | 26.6                         | 4.8                         | 148.8                               | 127.6                                |
| std error      |          | 0.0                           | 0.6                               | 1.2                          | 1.1                         | 7.8                                 | 3.5                                  |

|                |          | <b>Duodenal and gastric pancreas (head)</b> |                          |                                       |                                     |                         |
|----------------|----------|---------------------------------------------|--------------------------|---------------------------------------|-------------------------------------|-------------------------|
|                |          | <b>Analysis of beta cell mass</b>           |                          |                                       |                                     |                         |
| <b>Group</b>   | <b>#</b> | <b>Pancreas mass (mg)</b>                   | <b>Sections analyzed</b> | <b>Pancreas area (mm<sup>2</sup>)</b> | <b>β-cell area (mm<sup>2</sup>)</b> | <b>β-cell mass (mg)</b> |
| B6129 Sham D30 | 1        | 131                                         | 27                       | 866                                   | 3.3                                 | 0.50                    |
| B6129 Sham D30 | 2        | 107                                         | 28                       | 676                                   | 2.0                                 | 0.32                    |
| B6129 Sham D30 | 3        | 140                                         | 29                       | 652                                   | 2.9                                 | 0.62                    |
| B6129 Sham D30 | 4        | 123                                         | 21                       | 509                                   | 3.7                                 | 0.89                    |
| B6129 Sham D30 | 5        | 108                                         | 30                       | 533                                   | 2.4                                 | 0.49                    |
| average        |          | 122                                         | 27                       | 647                                   | 2.9                                 | 0.57                    |
| std error      |          | 6.4                                         | 2                        | 64                                    | 0.3                                 | 0.09                    |
| B6129 PDL D30  | 1        | 129                                         | 17                       | 717                                   | 3.6                                 | 0.65                    |
| B6129 PDL D30  | 2        | 115                                         | 28                       | 738                                   | 3.0                                 | 0.46                    |
| B6129 PDL D30  | 3        | 104                                         | 29                       | 538                                   | 2.2                                 | 0.42                    |
| B6129 PDL D30  | 4        | 118                                         | 26                       | 551                                   | 2.5                                 | 0.53                    |
| B6129 PDL D30  | 5        | 150                                         | 35                       | 587                                   | 2.2                                 | 0.56                    |
| average        |          | 123                                         | 27                       | 626                                   | 2.7                                 | 0.52                    |
| std error      |          | 7.8                                         | 3                        | 42                                    | 0.3                                 | 0.04                    |

SUPPLEMENTARY DATA

|                |   | Splenic pancreas (tail)    |                   |                                        |                                |                  |                               |                   |                               |                              |
|----------------|---|----------------------------|-------------------|----------------------------------------|--------------------------------|------------------|-------------------------------|-------------------|-------------------------------|------------------------------|
|                |   | Analysis of beta cell mass |                   |                                        |                                |                  | Analysis of islet replication |                   |                               |                              |
| Group          | # | Pancreas mass (mg)         | Sections analyzed | Total pancreas area (mm <sup>2</sup> ) | β-cell area (mm <sup>2</sup> ) | β-cell mass (mg) | β-cells counted               | ki67+ β-cells (%) | Islet cocktail+ cells counted | % ki67+ islet cocktail cells |
| B6129 Sham D30 | 1 | 135                        | 32                | 638                                    | 3.5                            | 0.74             |                               |                   |                               |                              |
| B6129 Sham D30 | 2 | 134                        | 14                | 465                                    | 2.3                            | 0.66             |                               |                   |                               |                              |
| B6129 Sham D30 | 3 | 138                        | 28                | 681                                    | 4.1                            | 0.83             | 191                           | 2.1               | 177                           | 0.6                          |
| B6129 Sham D30 | 4 | 130                        | 24                |                                        |                                | 0.79             | 654                           | 2.8               | 323                           | 1.9                          |
| B6129 Sham D30 | 5 | 138                        | 24                | 785                                    | 6.0                            | 1.06             | 1571                          | 1.1               | 837                           | 0.7                          |
| average        |   | 135                        | 24                | 645                                    | 4.0                            | 0.81             | 805                           | 2.0               | 446                           | 1.0                          |
| std error      |   | 1.5                        | 3                 | 52                                     | 0.6                            | 0.07             | 405                           | 0.5               | 200                           | 0.4                          |
| B6129 PDL D30  | 1 | 41                         | 13                | 189                                    | 3.2                            | 0.70             |                               |                   |                               |                              |
| B6129 PDL D30  | 2 | 33                         | 28                | 224                                    | 4.0                            | 0.59             |                               |                   |                               |                              |
| B6129 PDL D30  | 3 | 60                         | 15                | 228                                    | 3.9                            | 1.04             | 858                           | 2.4               | 471                           | 2.1                          |
| B6129 PDL D30  | 4 | 48                         | 17                | 241                                    | 3.6                            | 0.72             | 1498                          | 1.7               | 901                           | 1.6                          |
| B6129 PDL D30  | 5 | 42                         | 15                |                                        |                                | 1.16             | 942                           | 2.8               | 571.75                        | 1.7                          |
| average        |   | 84                         | 18                | 226                                    | 4.3                            | 0.84             | 1099                          | 2.3               | 648                           | 1.8                          |
| std error      |   | 6.7                        | 3                 | 10                                     | 0.6                            | 0.11             | 201                           | 0.3               | 130                           | 0.2                          |

**Supplementary Table 4.** Individual data from sham-operated or PDL 7 day Balb/c cohort at 7 days. (top) Age, body weight, and glycemia of sham-operated and PDL cohort. (middle) Morphometry and proliferation analysis of pancreas head. (bottom) Morphometry and proliferation analysis of pancreas tail.

|             |   | Balb/c 7 day Cohort    |                            |                       |                               |                      |
|-------------|---|------------------------|----------------------------|-----------------------|-------------------------------|----------------------|
|             |   | Age                    | Physiological observations |                       |                               |                      |
| Group       | # | Age at harvest (weeks) | Pre-OP body mass (g)       | Harvest body mass (g) | Harvest Blood glucose (mg/dl) | Body mass change (g) |
| Balb/c Sham | 1 | 9.0                    | 27.9                       | 29                    | 136.0                         | 0.6                  |
| Balb/c Sham | 2 | 9.0                    | 26.5                       | 26                    | 130.0                         | -0.5                 |
| Balb/c Sham | 3 | 9.0                    | 26.9                       | 26                    | 115.0                         | -0.8                 |
| Balb/c Sham | 4 | 9.0                    | 25.5                       | 27                    | 126.0                         | 1.2                  |
| Balb/c Sham | 5 | 9.0                    | 29.6                       | 30                    | 121.0                         | 0.4                  |
| average     |   |                        | 27.3                       | 27                    | 125.6                         | 0.2                  |
| std error   |   |                        | 0.7                        | 0.8                   | 3.6                           | 0.4                  |
| Balb/c PDL  | 1 | 9.0                    | 24.1                       | 25                    | 127.0                         | 1.0                  |
| Balb/c PDL  | 2 | 9.0                    | 26.6                       | 27                    | 130.0                         | 0.5                  |
| Balb/c PDL  | 3 | 9.0                    | 25.8                       | 26                    | 123.0                         | -0.3                 |
| Balb/c PDL  | 4 | 9.0                    | 26.0                       | 29                    | 124.0                         | 2.5                  |
| Balb/c PDL  | 5 | 9.0                    | 28.0                       | 29                    | 131.0                         | 1.3                  |
| average     |   |                        | 26.1                       | 27                    | 127.0                         | 1.0                  |
| std error   |   |                        | 0.6                        | 0.8                   | 1.6                           | 0.5                  |

SUPPLEMENTARY DATA

| Duodenal and gastric pancreas (head) |   |                            |                   |                        |                         |                               |                                    |                                       |
|--------------------------------------|---|----------------------------|-------------------|------------------------|-------------------------|-------------------------------|------------------------------------|---------------------------------------|
|                                      |   | Analysis of beta cell mass |                   |                        |                         | Analysis of islet replication |                                    |                                       |
| Group                                | # | Pancreas mass (mg)         | Sections analyzed | $\beta$ -cell area (%) | $\beta$ -cell mass (mg) | $\beta$ -cells counted        | % BrdU <sup>+</sup> $\beta$ -cells | % BrdU <sup>+</sup> intra-islet cells |
| Balb/c Sham                          | 1 | 159.0                      | 19.0              | 0.4                    | 0.6                     | 2919                          | 0.1                                | 0.3                                   |
| Balb/c Sham                          | 2 | 147.0                      | 14.0              | 0.4                    | 0.6                     | 2744                          | 0.1                                | 0.3                                   |
| Balb/c Sham                          | 3 | 133.0                      | 13.0              | 0.5                    | 0.7                     | 2293                          | 0.3                                | 0.4                                   |
| Balb/c Sham                          | 4 | 135.0                      | 15.0              | 0.5                    | 0.6                     | 4581                          | 0.2                                | 0.7                                   |
| Balb/c Sham                          | 5 | 153.0                      | 15.0              | 0.5                    | 0.8                     | 3563                          | 0.1                                | 0.3                                   |
| average                              |   | 145.4                      | 15.2              | 0.5                    | 0.7                     | 3220                          | 0.1                                | 0.4                                   |
| std error                            |   | 5.0                        | 1.0               | 0.0                    | 0.0                     | 396.6                         | 0.0                                | 0.1                                   |
| Balb/c PDL                           | 1 | 140.0                      | 20.0              | 0.3                    | 0.5                     | 5396                          | 0.1                                | 0.3                                   |
| Balb/c PDL                           | 2 | 129.0                      | 15.0              | 0.4                    | 0.5                     | 2520                          | 0.2                                | 0.3                                   |
| Balb/c PDL                           | 3 | 153.0                      | 18.0              | 0.3                    | 0.5                     | 692                           | 0.2                                | 0.6                                   |
| Balb/c PDL                           | 4 | 132.0                      | 17.0              | 0.5                    | 0.6                     | 5832                          | 0.2                                | 0.3                                   |
| Balb/c PDL                           | 5 | 144.0                      | 18.0              | 0.4                    | 0.5                     | 2953                          | 0.1                                | 0.5                                   |
| average                              |   | 139.6                      | 17.6              | 0.4                    | 0.5                     | 3479                          | 0.2                                | 0.4                                   |
| std error                            |   | 4.3                        | 0.8               | 0.0                    | 0.0                     | 953.3                         | 0.0                                | 0.1                                   |

| Splenic pancreas (tail) |   |                            |                   |                        |                         |                               |                                    |                                       |
|-------------------------|---|----------------------------|-------------------|------------------------|-------------------------|-------------------------------|------------------------------------|---------------------------------------|
|                         |   | Analysis of beta cell mass |                   |                        |                         | Analysis of islet replication |                                    |                                       |
| Group                   | # | pancreas mass (mg)         | sections analyzed | $\beta$ -cell area (%) | $\beta$ -cell mass (mg) | $\beta$ -cells counted        | % BrdU <sup>+</sup> $\beta$ -cells | % BrdU <sup>+</sup> intra-islet cells |
| Balb/c Sham             | 1 | 163.0                      | 18.0              | 0.5                    | 0.8                     | 7544                          | 0.1                                | 0.5                                   |
| Balb/c Sham             | 2 | 151.0                      | 14.0              | 0.6                    | 1.0                     | 6261                          | 0.2                                | 0.8                                   |
| Balb/c Sham             | 3 | 136.0                      | 15.0              | 0.7                    | 0.9                     | 4280                          | 0.4                                | 0.5                                   |
| Balb/c Sham             | 4 | 139.0                      | 16.0              | 0.6                    | 0.8                     | 4514                          | 0.3                                | 0.6                                   |
| Balb/c Sham             | 5 | 168.0                      | 16.0              | 0.6                    | 1.0                     | 7189                          | 0.4                                | 0.8                                   |
| average                 |   | 151.4                      | 15.8              | 0.6                    | 0.9                     | 5958                          | 0.3                                | 0.6                                   |
| std error               |   | 6.3                        | 0.7               | 0.0                    | 0.0                     | 671.7                         | 0.1                                | 0.1                                   |
| Balb/c PDL              | 1 | 38.0                       | 9.0               | 2.8                    | 1.0                     | 5644                          | 0.5                                | 1.5                                   |
| Balb/c PDL              | 2 | 32.0                       | 9.0               | 2.0                    | 0.7                     | 9297                          | 0.3                                | 0.9                                   |
| Balb/c PDL              | 3 | 37.0                       | 14.0              | 1.8                    | 0.7                     | 4061                          | 0.3                                | 1.0                                   |
| Balb/c PDL              | 4 | 36.0                       | 17.0              | 3.0                    | 1.1                     | 2716                          | 0.7                                | 1.7                                   |
| Balb/c PDL              | 5 | 30.0                       | 11.0              | 3.6                    | 1.1                     | 3130                          | 0.4                                | 1.5                                   |
| average                 |   | 34.6                       | 12.0              | 2.6                    | 0.9                     | 4970                          | 0.4                                | 1.3                                   |
| std error               |   | 1.5                        | 1.5               | 0.3                    | 0.1                     | 1193.1                        | 0.1                                | 0.2                                   |

SUPPLEMENTARY DATA

**Supplementary Table 5.** Primer sequences (top) and antisera (bottom).

| Gene        | Forward                   | Reverse                      | Probe                      |
|-------------|---------------------------|------------------------------|----------------------------|
| Amylase     | AAATCTGCACAAGGTCTGGA      | CCACAGGTAAGTCTTGTTC          | CGGACACCAACATTGTTGCACCT    |
| Insulin     | CTTCAGACCTTGGCGTTGGA      | ATGCTGGTGCAGCACTGATC         | CCCGGCAGAAGCGTGGCATT       |
| Glucagon    | GAATGAAGACAACGCCACTCA     | CGGCGGGAGTCGAGGTA            | AGGGCACATTCACCAGCGACTACAGC |
| Reg3 beta   | CCTGCTCCGTCATGTCCT        | CGTGCGGAGGGTATATTCTT         | TGCTGCTCTCCTGCCTGATGC      |
| Reg3 gamma  | ACCATCACCATCATGTCCTG      | GGCATCTTTCTTGGCAACTT         | TGCTGCTCTCCTGCCTGATGC      |
| Glut2       | TCTTCACGGATGCCAATTACC     | AGAAGTCTGGGCCATGTG           | AGCCCATCCTCGTGGCGCTG       |
| PCSK2       | TGCATAAAGACGGAGAGGAA      | GGTGTAGGCTGCGTCTTCTT         | TGGCCTTTGCAAGCCCATG        |
| IAAPP       | CACACAACGCCTGGCAAAC       | TGTATTCGATCCCACGTTGGT        | TCGTTCCAGCAACAACCTTGGTCCA  |
| ptp1b       | CTTCCGTGGACATCAAGAAAGTACT | GGCGCCCTCGATGACA             | CTCATCCAGACTGCCGACCAGCTG   |
| Ngn3        | GTCGGGAGAAGTGGATGGC       | GGAGCAGTCCCTAGGTATG          | CCGGAGCCTCGGACCACGAA       |
| Nkx6.1      | GCCCCGAGTGATGCAGAGT       | TCTTCCCATCTTTGTCCAACA        | TGGAGGGACGCGCGCCTT         |
| Pdx1        | AGGAAAACAAGAGGACCCGTA     | CGGGAGATGTATTTGTTAATAAGAATTC | CCTACACCCGGGCGCAGCTG       |
| Fas         | GTGGATCTGGGCTGTCCT        | TCCTTGATATAATCCTTCTGAGCA     | TTCACGAACCCGCTCCTCA        |
| FasLig      | CTGGTTGGAATGGGATTAGG      | TTAAGGCTTTGGTTGGTGAA         | CCACCTGCAGAAGGAAGTGGCA     |
| IL1 beta    | TCAGGCAGGCAGTATCACTC      | CCATGAGTCACAGAGGATGG         | CCCCTGGACCTTCCAGGATGA      |
| CD45        | CAAACCTCTGGCCTTTGGAT      | CACTGGGTGTAGGTGTTTGC         | TGCCCTTCTGGACACAGAAGTCTTTG |
| F4/80       | TTTGGCTGCTCCTCTTCTG       | TCATTACACCACCAAGTGT          | CCACACTTCCCACCTGGGAC       |
| Cyclophilin | CAGACGCCACTGTGCTTT        | TGTCTTTGGAAGTCTGTCTGCAA      | CCCTTGGGCGCGTCTCCTT        |

| Antigen     | Supplier          | Source     | Stock     |
|-------------|-------------------|------------|-----------|
| Amylase     | Abcam             | Rabbit     | ab21156   |
| Insulin     | Zymed             | Guinea Pig | 4367      |
| ki67        | BD                | Mouse      | 550609    |
| Cytokeratin | DAKO              | Rabbit     | Z062201-2 |
| CD45        | BD Pharmingen     | Rat        | 550539    |
| Ngn3        | IOWA DSHB         | Mouse      | F25A1B3   |
| CldU/BrdU   | Accurate Chemical | Rat        | OBT0030   |
| IdU         | BD Pharmingen     | Mouse      | NC9516321 |
| Gluc/PP/Som | Zymed             | Rabbit     |           |
| YFP         | Abcam             | Rabbit     | ab6673    |

SUPPLEMENTARY DATA

**Supplementary Figure 1.** Ligation of the splenic lobe of the pancreas does not affect body mass or glucose homeostasis in mixed genetic background or Balb/c mice compared to shams; PDL causes major morphologic changes. (a) Ligation suture is placed on the splenic branch of the pancreatic duct. Figure adapted from Page et al, *Journal of the Pancreas*, 2000, 1(4):191-203. (b-c) Mixed genetic background cohort. Body mass (b) and random fed blood glucose (c). (d-e) Balb/c cohort. Body mass (d) and random fed blood glucose (e). (f-g) Partial pancreatectomy in the Balb/c cohort. Body mass (f) and random fed blood glucose (g). (h-j) Glucose tolerance tests in mixed genetic background cohort at 7 days (h), 14 days (i), and 30 days (j). Mean  $\pm$  S.E.M., 5-10 animals per group.

a

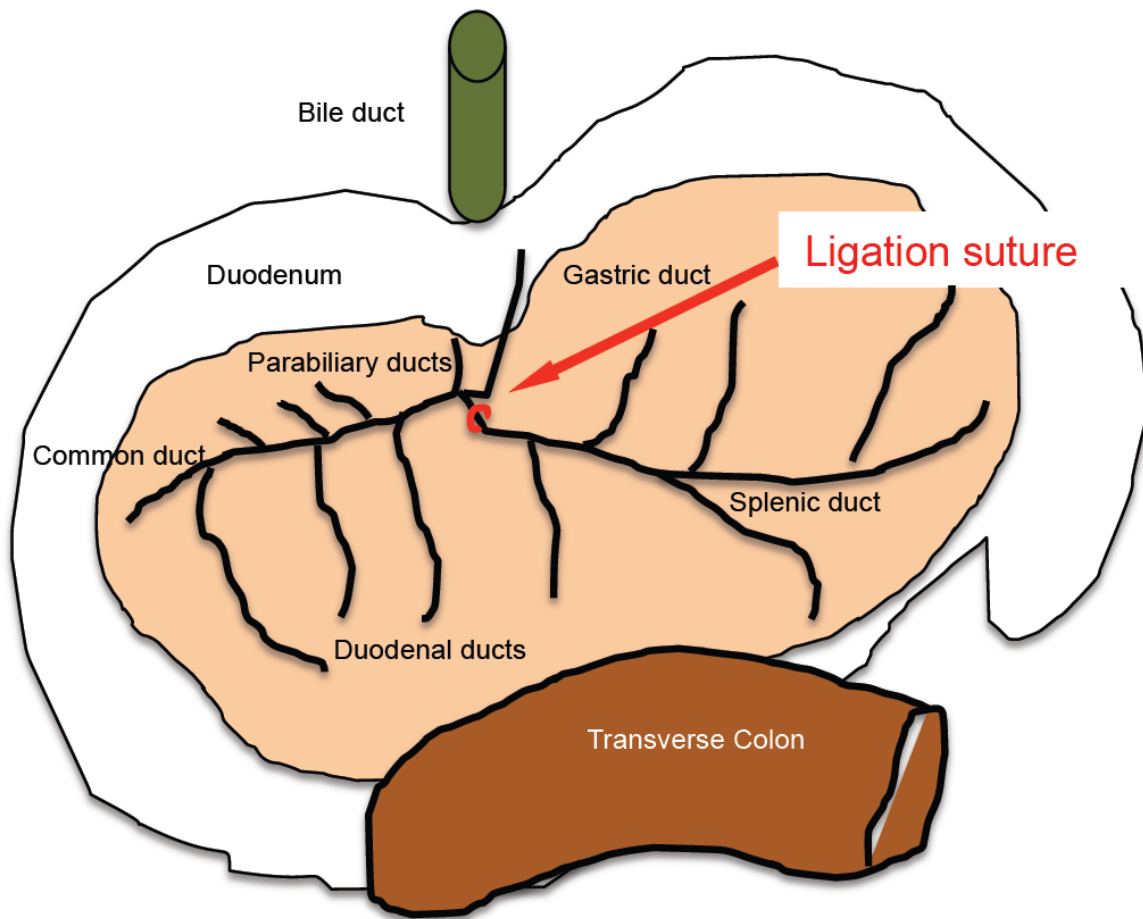

b

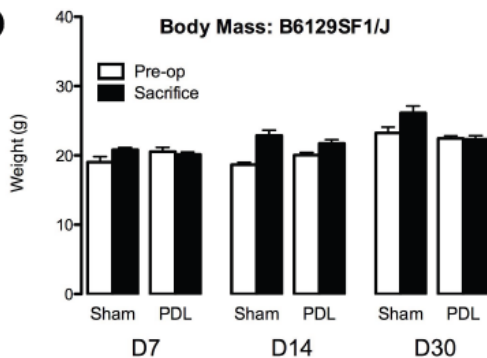

c

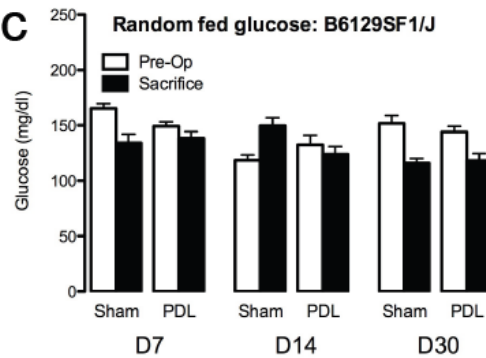



SUPPLEMENTARY DATA

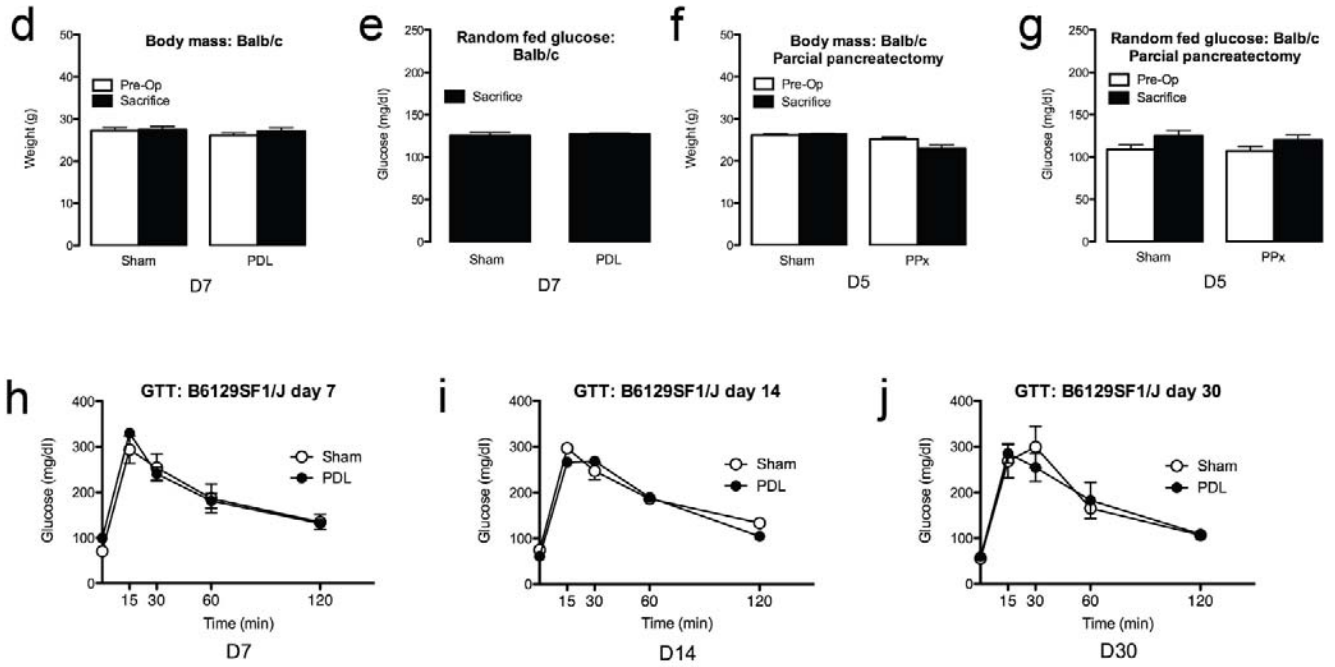

SUPPLEMENTARY DATA

**Supplementary Figure 2.** PDL causes major morphologic changes. Characteristic histopathology of DL pancreas stained with hematoxylin and eosin (**a**) and Masson's trichrome staining (**b**) of sham and DL tail at 7, 14, and 30 days. Note replacement of acinar tissue by fat and progressive fibrosis. Scale bars: 100  $\mu$ M.

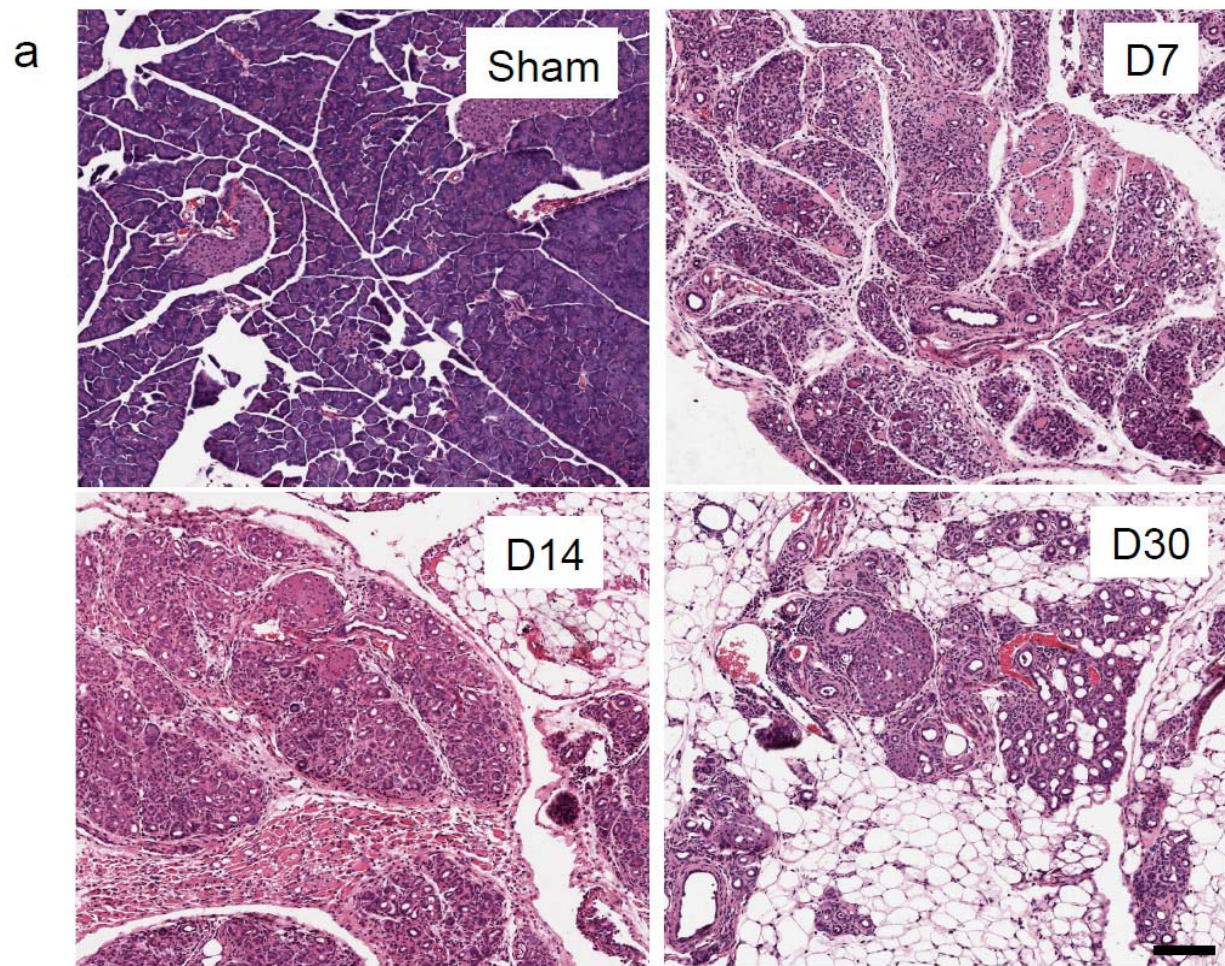

SUPPLEMENTARY DATA

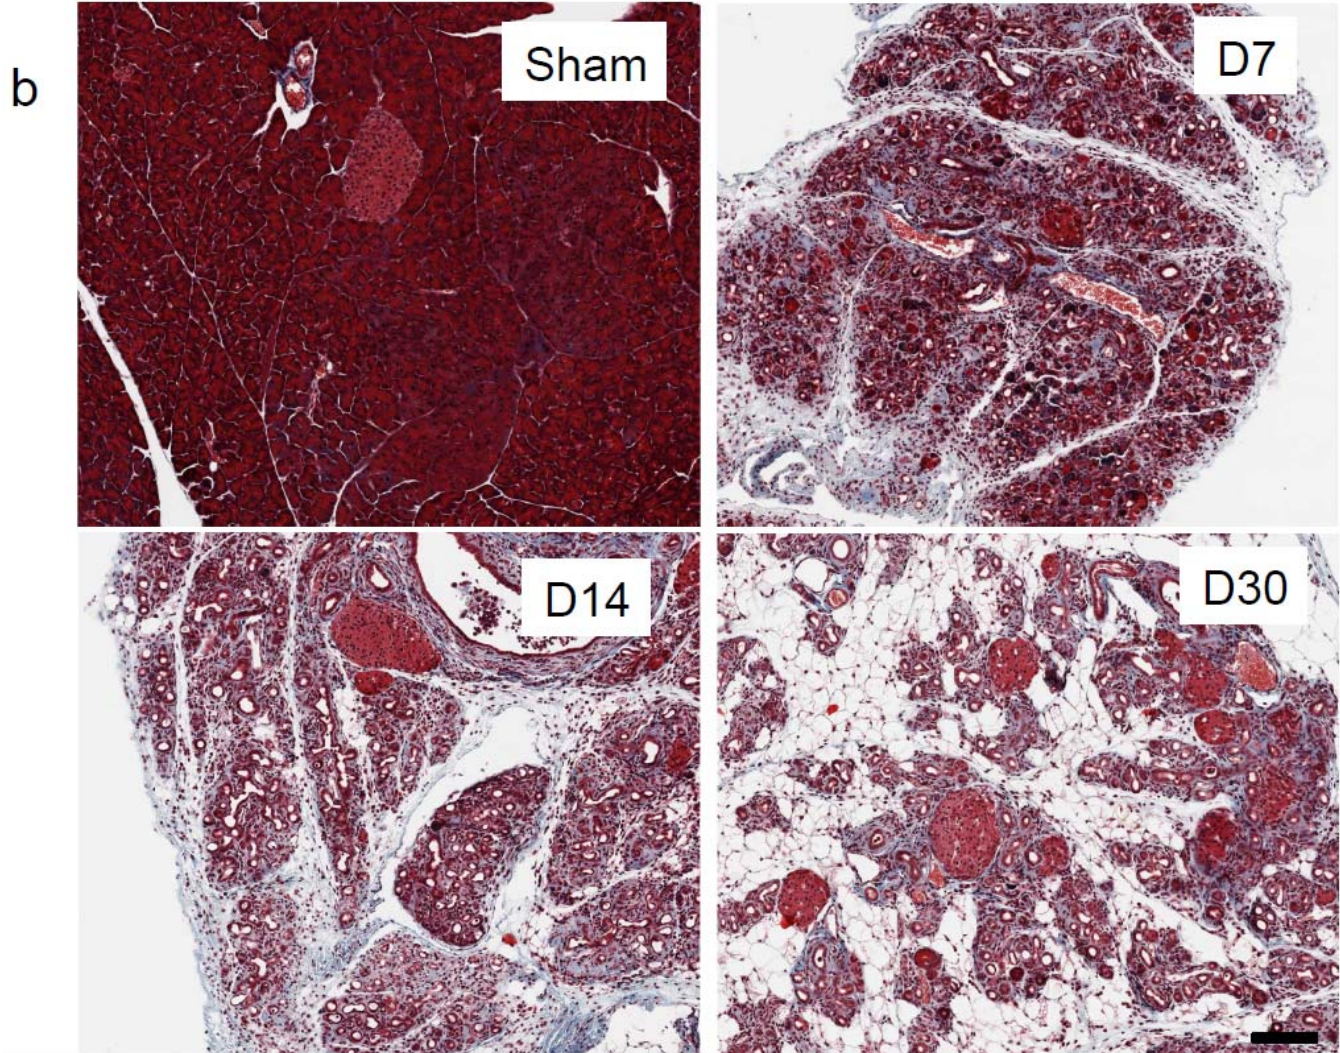

SUPPLEMENTARY DATA

**Supplementary Figure 3.** qPCR mRNA expression studies of pancreas samples after PDL versus uninjured head or sham-operated control tail. Results expressed as fold change from control when compared to cyclophilin A. Mean  $\pm$  S.E.M., 3 biological replicates per group.

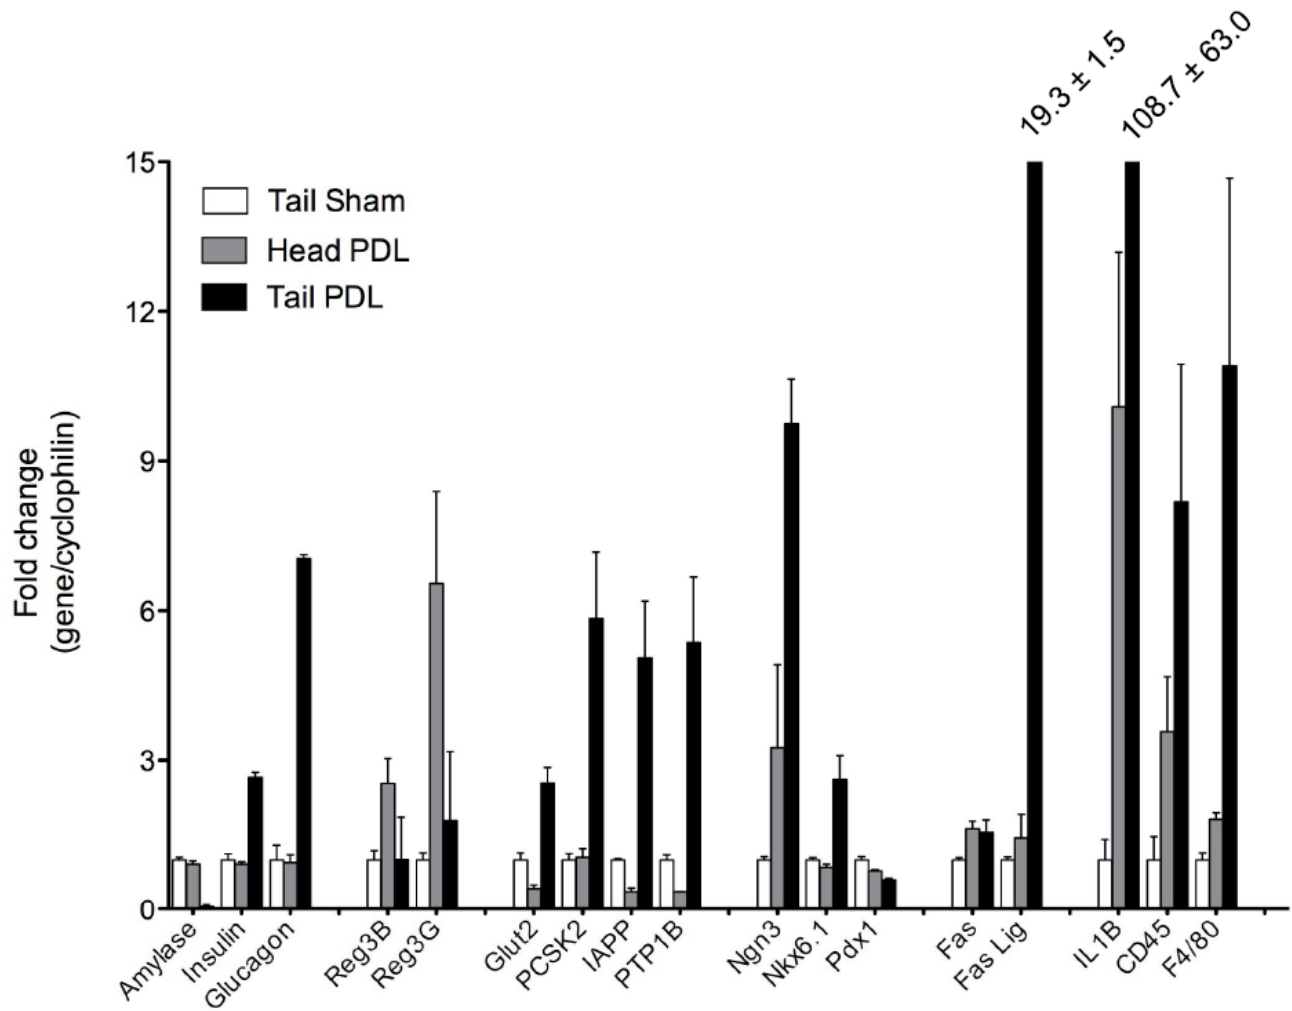

SUPPLEMENTARY DATA

**Supplementary Figure 4.** Microscopy and image processing strategy of  $\beta$ -cells. (a) The entire pancreas was sampled at  $95\mu\text{m}$  intervals in the mixed genetic background cohort ( $160\mu\text{m}$  intervals were performed in the Balb/c cohort). (b-d) An automated stage was used to scan and tile images from entire longitudinal sections. (b) Schematic. (c) Spliced images, acquired with a 5x objective in the fluorescent channel cy2 (green) for total pancreas and cy3 (yellow) for insulin. (d) Volocity analysis software was used to find the area of total pancreatic tissue (white border) and  $\beta$ -cell tissue (blue border). Scale bars, 2mm.

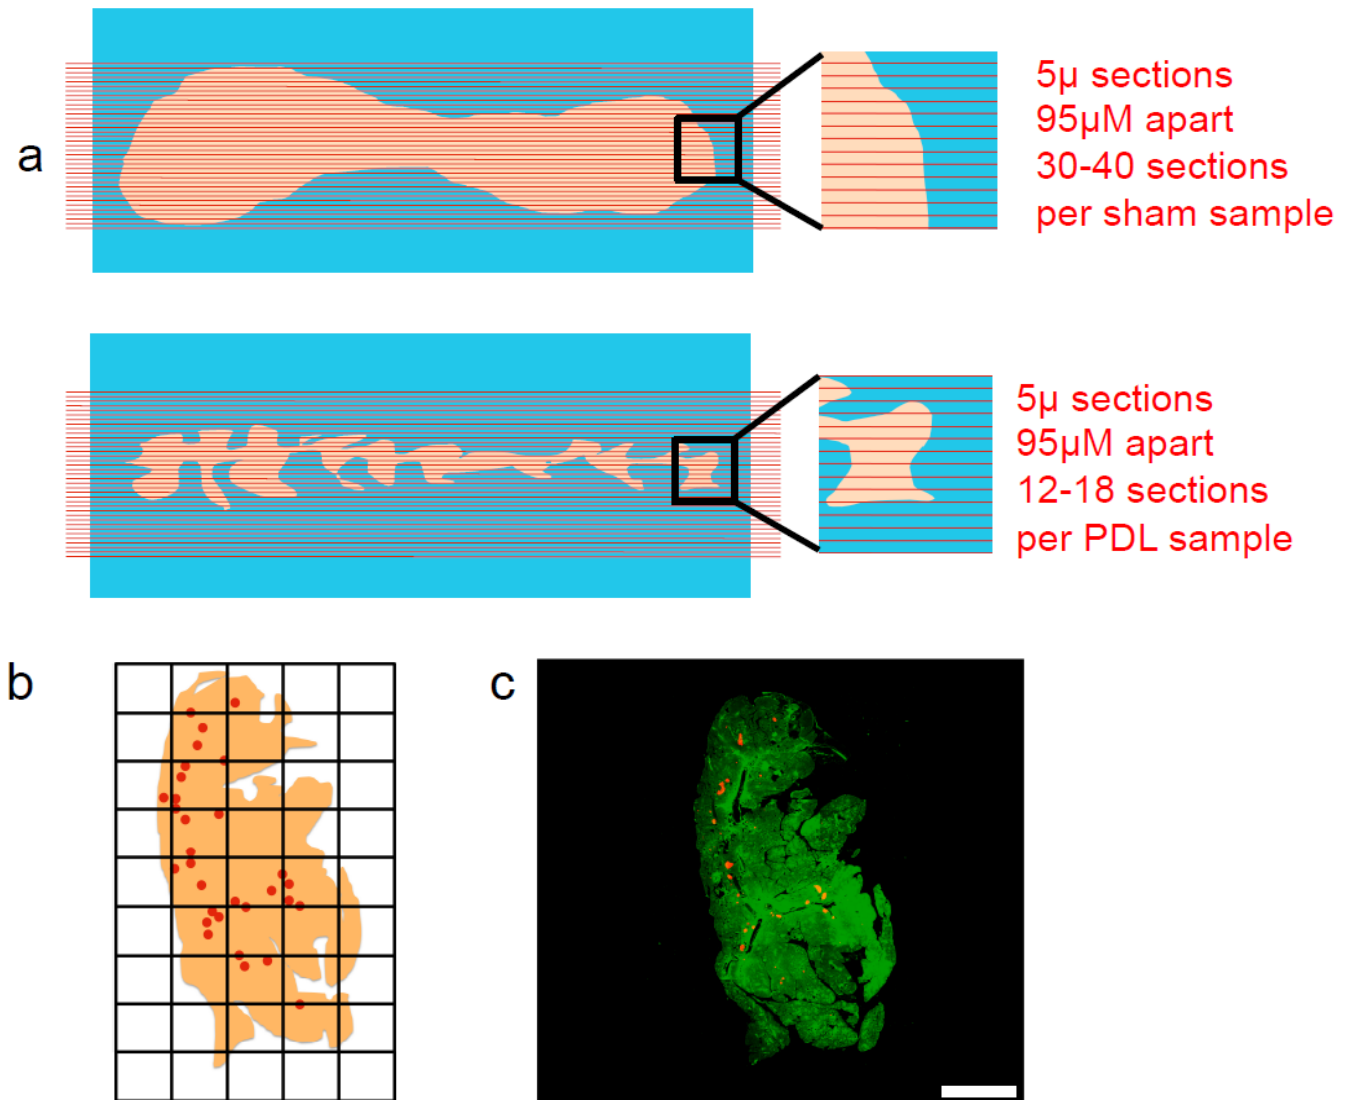

# SUPPLEMENTARY DATA

d

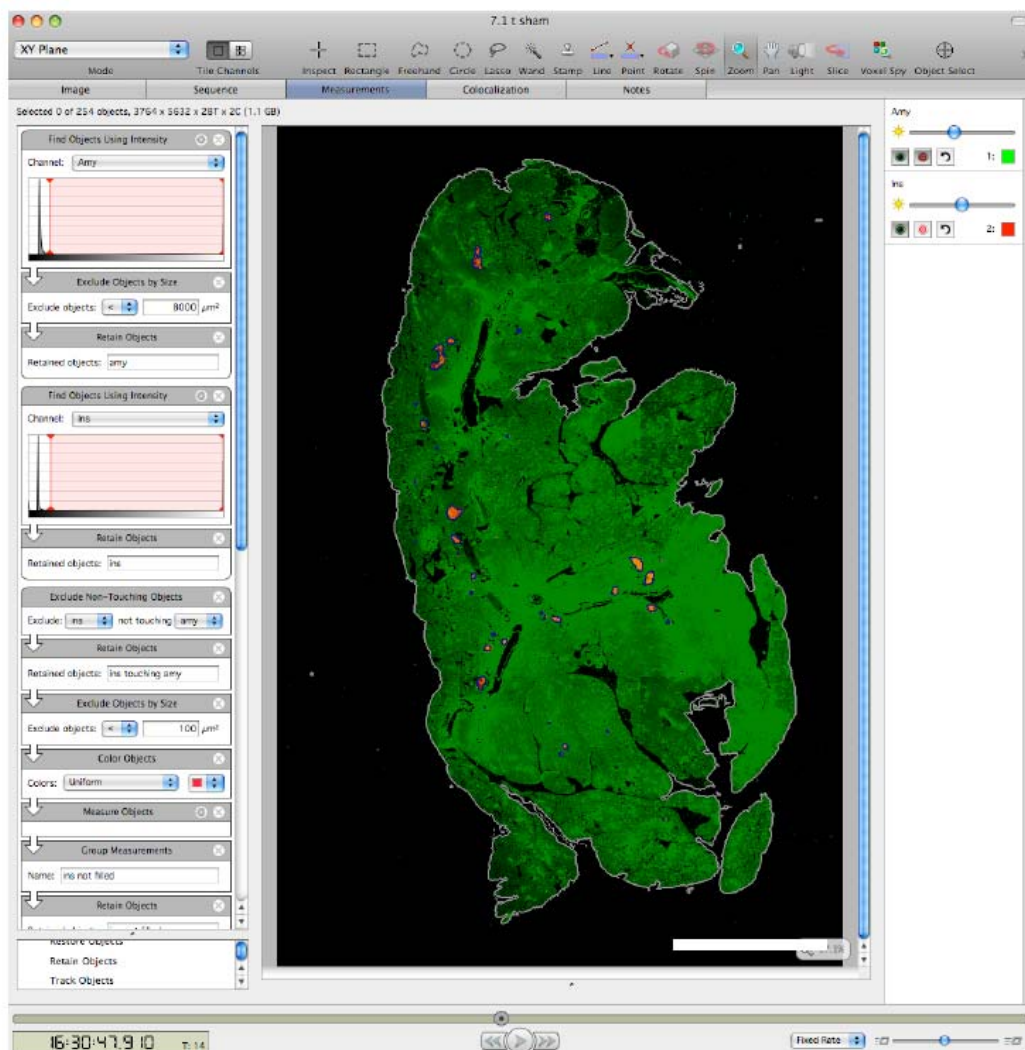

SUPPLEMENTARY DATA

**Supplementary Figure 5.** PDL increases average insulin area and is associated with reduced islet size (a, b) Quantitative analysis of average  $\beta$ -cell area in mixed genetic background mice (a) and Balb/c mice (b), assessed by insulin<sup>+</sup> area compared to total pancreas area. Mean  $\pm$  S.E.M., 4-5 animals per group. (c) Quantitative analysis of average islet size. Mean  $\pm$  S.E.M, 4-5 animals per group. \*\*:  $p < 0.01$ , \*\*\*:  $p < 0.001$ , \*\*\*\*:  $p < 0.0001$ , ligated vs. unligated pancreas tail.

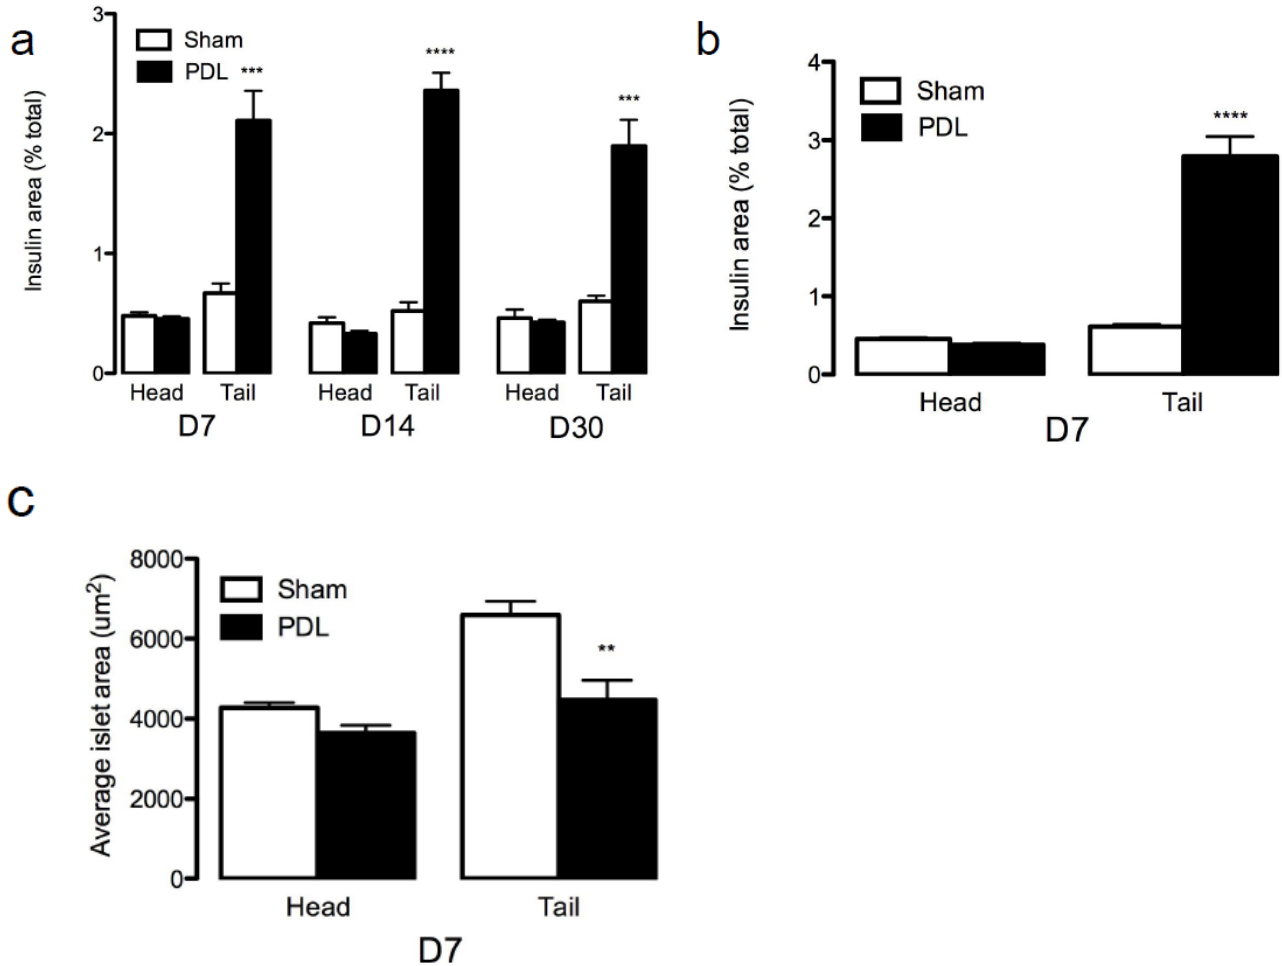

SUPPLEMENTARY DATA

**Supplementary Figure 6.** Pancreatic insulin content is only slightly increased by PDL. Quantitative analysis of total insulin content from sham or PDL pancreata harvested at day 7. Mean  $\pm$  S.E.M, 4-5 animals per group. \*\*:  $p < 0.01$ , \*\*\*:  $p < 0.001$ , ligated vs. unligated pancreas tail.

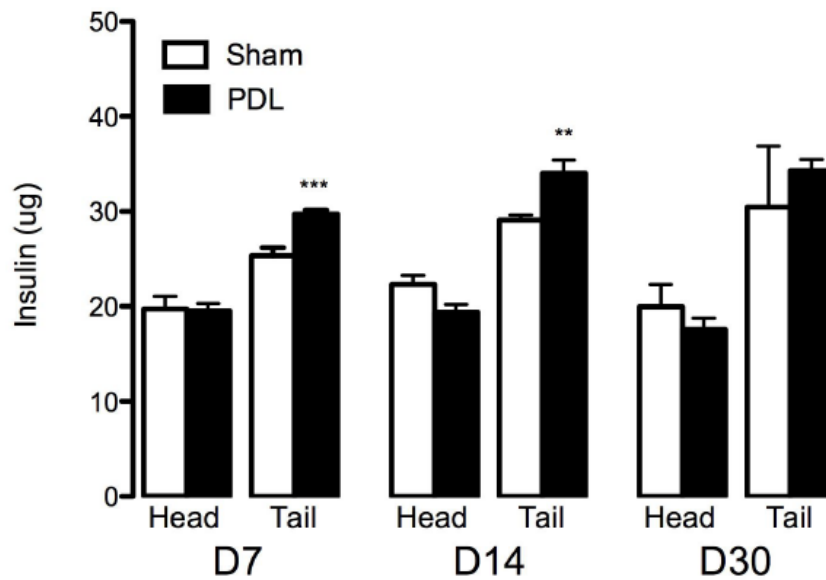



SUPPLEMENTARY DATA

**Supplementary Figure 7.** PDL does not induce serial proliferation in  $\beta$ -cells or their adult progenitors. (a) Images of islets from sham and PDL tail at 7, 14, and 30 days. DAPI (blue) insulin (yellow), CldU (green), IdU (red). (b-d) Quantitative analysis of thymidine incorporation in  $\beta$ -cells or total intra-islet cells after thymidine analogue labeling, as detected by cells that contained any deoxyuridine analogue (b), CldU<sup>+</sup> (c), or IdU<sup>+</sup> (d). Mean  $\pm$  S.E.M., 4-5 animals per group. (e) Representative image of CldU<sup>+</sup> and IdU<sup>+</sup> intra-islet nuclei after PDL. White triangles denote non- $\beta$ -cells that were CldU<sup>+</sup> or IdU<sup>+</sup>. Red/green triangles denote non- $\beta$ -cells that were both CldU<sup>+</sup> and IdU<sup>+</sup>. Scale bars: 50  $\mu$ M.

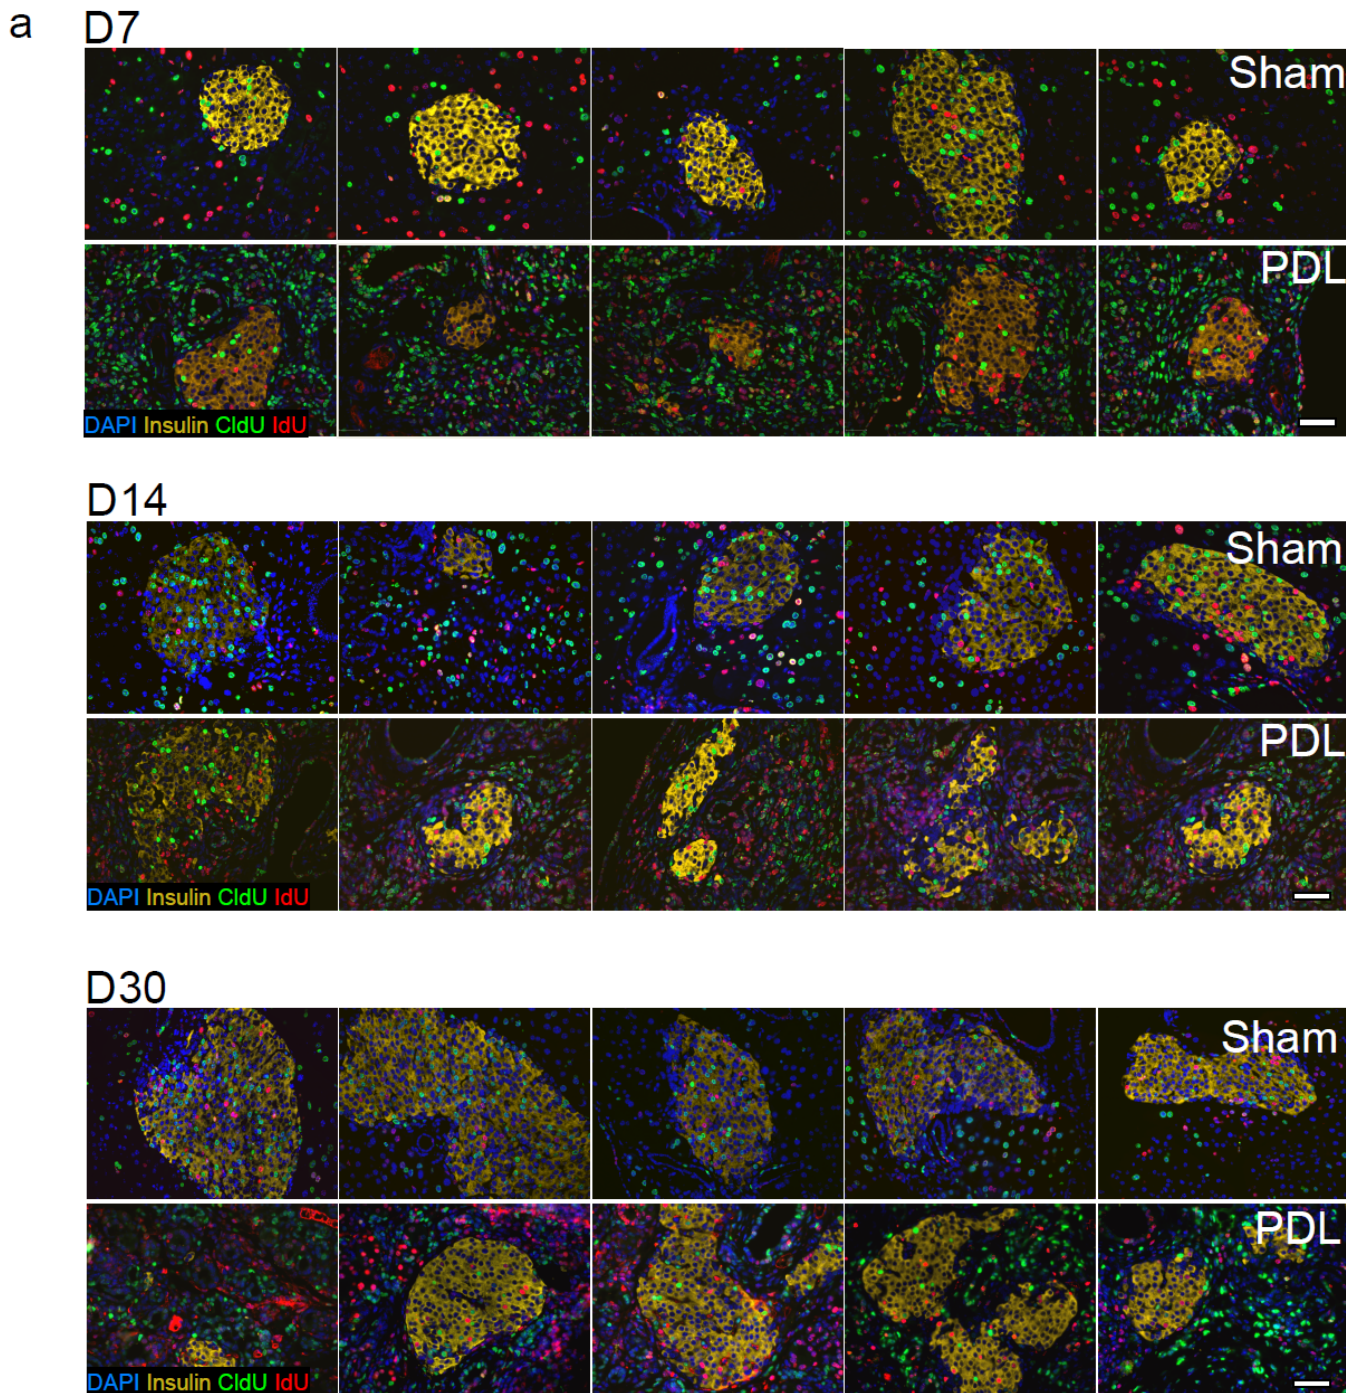

SUPPLEMENTARY DATA

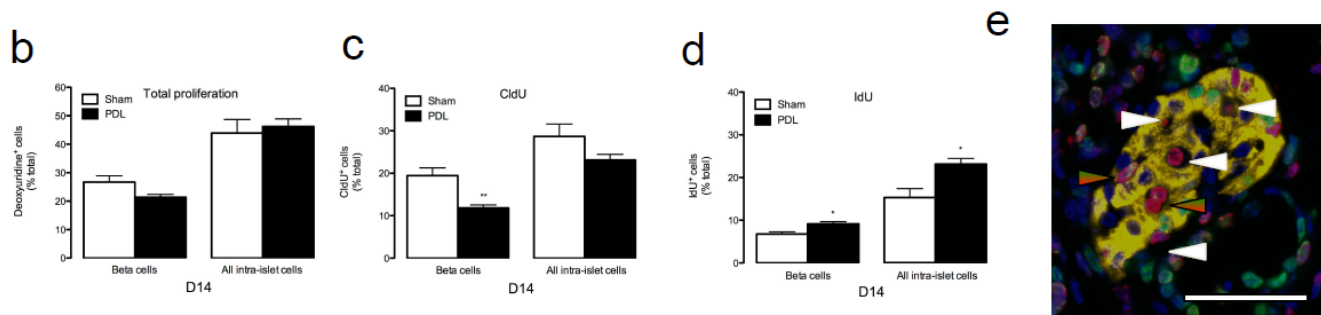

**Supplementary Figure 8.** PDL does not convert non  $\beta$ -cells to dilute the  $\beta$ -cell lineage, as assessed by low-level spontaneous recombination within  $\beta$ -cells. (a) Spontaneous recombination gradually increases between 8 and 16 weeks of age. Quantitative analysis of  $\beta$ -cell recombination in 8,10,12, and 16 week-old mice assessed by the presence of YFP<sup>+</sup> insulin<sup>+</sup> cells compared to total insulin<sup>+</sup> cells. Mean  $\pm$  S.E.M., 4-8 animals per group. (b) Genetic lineage tracing scheme used to assess the cellular origin of  $\beta$ -cells after PDL. Experimental design and possible outcomes. (c-e) Spontaneous recombination within  $\beta$ -cells after sham or PDL treatment. Images from vehicle treated sham and PDL pancreas at 7 and 30 days, respectively. DAPI (blue), insulin (red), YFP (green). (f) Quantitative analysis of  $\beta$ -cell recombination, assessed by the presence of YFP<sup>+</sup> insulin<sup>+</sup> cells compared to total insulin<sup>+</sup> cells. Mean  $\pm$  S.E.M., 4-5 animals per group. The similar percentages of YFP labeled cells after tamoxifen induction and PDL indicates that  $\beta$ -cells are derived from pre-existing  $\beta$ -cells. (g) Tamoxifen and/or activated CreER had no influence upon  $\beta$ -cell proliferation at 7 days, as assessed by ki67. Mean  $\pm$  S.E.M., 5 animals per group. Scale bars: 50  $\mu$ M. \*:  $p < 0.05$ , ligated vs. unligated pancreas tail.

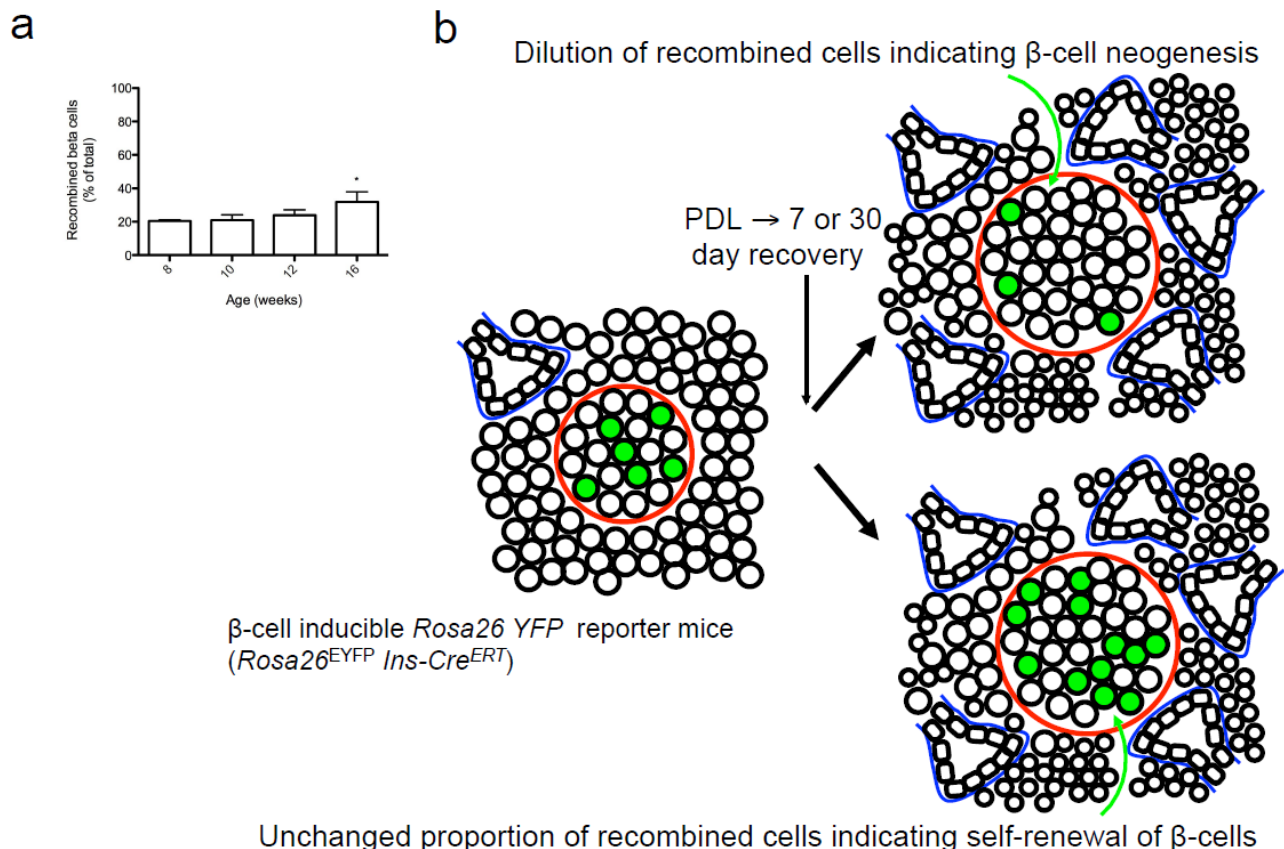

SUPPLEMENTARY DATA

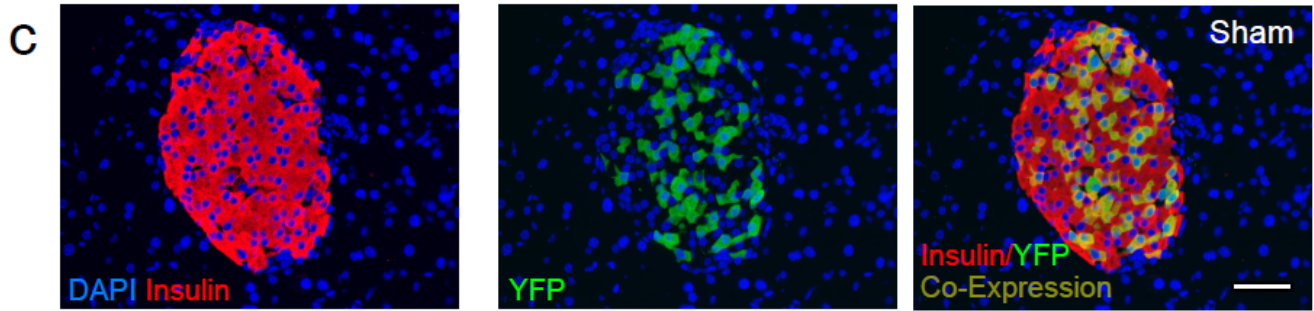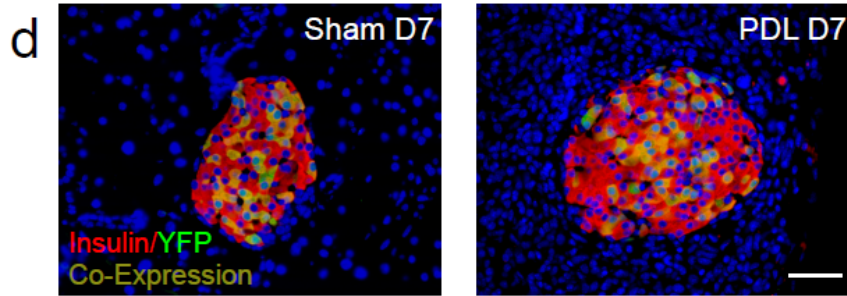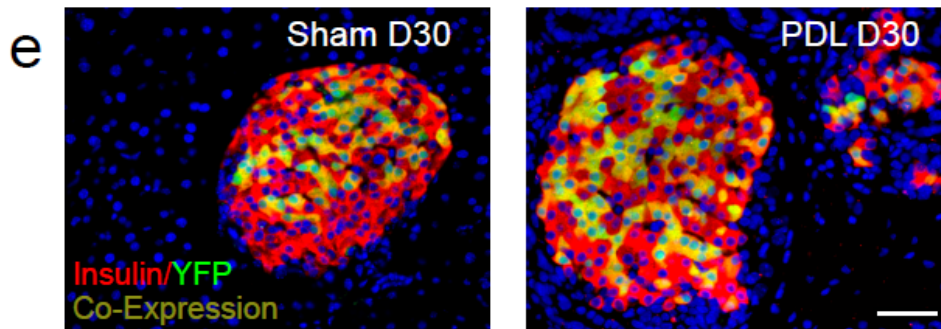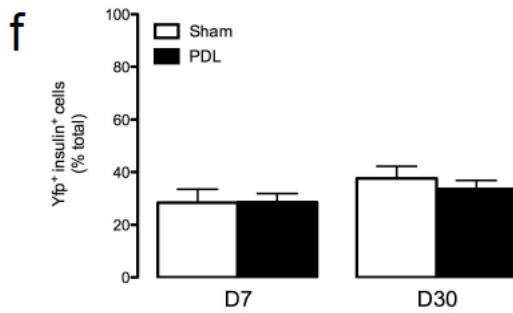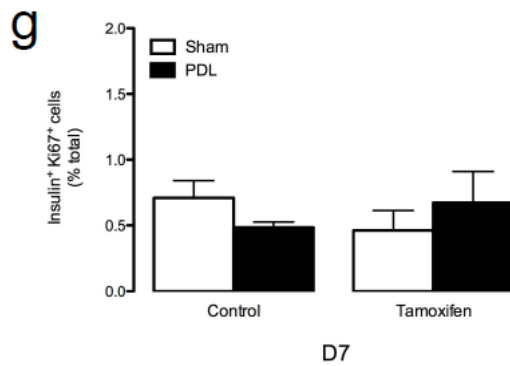

SUPPLEMENTARY DATA

**Supplementary Figure 9.** Variable recombination in UBC-CreER ROSA reporter mice before and after ductal ligation. Dose dependent recombination in a variety of pancreatic tissues in the basal state within individual mice.

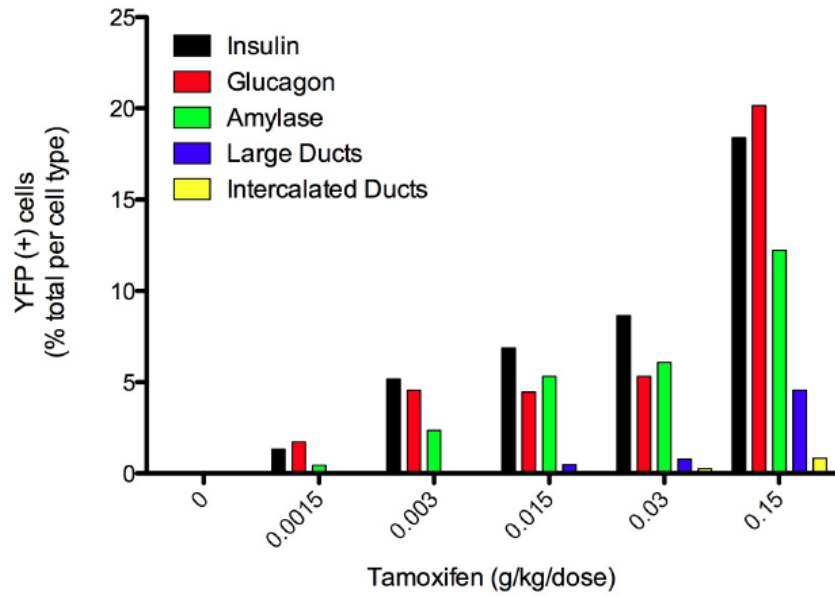

Supplement: supp_db12-0848_DB120848SupplementaryData.pdf [file supp_db12-0848_DB120848SupplementaryData.pdf]
